# Supplementary material
Source: PubMed Central journal article supplement (PMC7895493)
Supplement: NIHMS1670193-supplement-1.pdf [file NIHMS1670193-supplement-1.pdf]

## APPENDIX

Supplementary Table 1. Summary of Global Neurosurgery Publications

| Article Name                                                                    | First Author                           | Times Cited | Year Published | Journal                                | Impact Factor (5-Year) | Institution of Corresponding Author                                 |
|---------------------------------------------------------------------------------|----------------------------------------|-------------|----------------|----------------------------------------|------------------------|---------------------------------------------------------------------|
| Neurosurgery in the Developing World: Specialty Service and Global Health       | Dempsey, 2018 <sup>35</sup>            | 4           | 2018           | <i>World Neurosurg</i>                 | 2.135                  | University of Wisconsin                                             |
| Moving Forward Together: The Lancet Commission on Global Surgery report...      | Mansouri, et al., 2015 <sup>36</sup>   | 3           | 2015           | <i>Br J Neurosurg</i>                  | 1.313                  | University of Toronto                                               |
| Global Cardiac Surgery: Lessons Learnt from the Global Neurosurgery Movement... | Vervoort, et al., 2009 <sup>37</sup>   | 3           | 2019           | <i>Heart Asia</i>                      | None                   | Program in Global Surgery and Social Change, Harvard Medical School |
| Towards Guideline-Based Management of Tethered Cord Syndrome in Spina Bifida... | Bradko et al., 2019 <sup>38</sup>      | 2           | 2019           | <i>Neurospine</i>                      | None                   | Baylor College of Medicine and Texas Children's Hospital            |
| Surgery for Epilepsy: The Need for Global Acceptance and Access                 | Warf, 2016 <sup>39</sup>               | 1           | 2016           | <i>Lancet Neurol</i>                   | 30.542                 | Harvard Medical School, Boston Children's Hospital                  |
| Barriers to Global Surgery Academic Collaborations                              | Onyia and Ojo, 2019 <sup>40</sup>      | 0           | 2019           | <i>J Neurosurg</i>                     | 4.483                  | Lagoon Hospitals, Lagos                                             |
| Financial Investment in Global Surgery-Codevelopment...                         | Sabatino, et al., 2019 <sup>41</sup>   | 0           | 2019           | <i>JAMA Surg</i>                       | 8.928                  | Rutgers Robert Wood Johnson Medical School                          |
| Neurosurgery Initiatives in Global Health                                       | Prabhu, 2015 <sup>42</sup>             | 0           | 2015           | <i>World Neurosurg</i>                 | 2.135                  | Loyola University Medical Center/Stritch School of Medicine         |
| Neurostimulation Options for Failed Back Surgery Syndrome...                    | Rigoard and Slavin, 2015 <sup>43</sup> | 0           | 2015           | <i>Neurochirurgie</i>                  | 0.974                  | Centre hospitalier universitaire (CHU) de Poitiers                  |
| Neurosurgery, Education and Development (NED) Foundation...                     | Piquer, et al., 2015 <sup>44</sup>     | 0           | 2015           | 15th European Congress of Neurosurgery | None                   | Hospital Univ Ribera                                                |
| Predictors of Return to Normal Neurological Function After...                   | Ramos, et al., 2019 <sup>45</sup>      | 0           | 2019           | <i>Neurosurgery</i>                    | 4.415                  | Albert Einstein College of Medicine                                 |
| The International Society for Pediatric Neurosurgery...                         | Abbott, 2009 <sup>46</sup>             | 0           | 2009           | <i>Childs Nerv Syst</i>                | 1.347                  | Montefiore Medical Center and Albert Einstein College of Medicine   |

The summary of the neurosurgery articles by title, first author, total citations, publication year, journal, the impact factor for 5 years, and institution of the corresponding author. These articles met the inclusion criteria but did not have a sufficient number of citations to be included.
